# Supplementary material for: Controlled fabrication of hierarchical WO3hydrates with excellent adsorption performance
Source: Royal Society of Chemistry journal article supplement (doi:10.1039/c3ta13897f), 2013-11-22
Supplement: c3ta13897f.pdf [file c3ta13897f.pdf]

# Electronic Supplementary Information

## Controlled Fabrication of Hierarchical WO<sub>3</sub> Hydrates with Excellent Adsorption Performance

Baixiong Liu<sup>a,b</sup>, Jinshu Wang<sup>a,\*</sup>, Junshu Wu<sup>a</sup>, Hongyi Li<sup>a</sup>, Zhifei Li<sup>a</sup>, Meiling Zhou<sup>a</sup>, Tiejong Zuo<sup>a</sup>

<sup>a</sup> College of Materials Science and Engineering, Beijing University of Technology, Beijing 100124, China; <sup>b</sup> Institute of Research and Engineering, Jiangxi University of Science and Technology, Ganzhou Jiangxi 341000, China.

\* Corresponding author. Tel./Fax: 086-10-67391101. E-mail: wangjsh@bjut.edu.cn (J.S. Wang)

**Table S1.** Pseudo first-order kinetic parameters for the adsorption of MB and Pb<sup>2+</sup> onto S1 and S2.

| MB<br>/Pb <sup>2+</sup> | C <sub>0</sub><br>(mg/L) | K <sub>1</sub><br>(1/min) |        | q <sub>e, exp</sub><br>(mg/g) |       | q <sub>e, cal</sub><br>(mg/g) |        | R <sup>2</sup> |        |
|-------------------------|--------------------------|---------------------------|--------|-------------------------------|-------|-------------------------------|--------|----------------|--------|
|                         |                          | S1                        | S2     | S1                            | S2    | S1                            | S2     | S1             | S2     |
| MB                      | 100                      | 0.0103                    | 0.0079 | 99.60                         | 62.20 | 38.823                        | 44.148 | 0.8215         | 0.9147 |
|                         | 80                       | 0.0108                    | 0.0107 | 79.78                         | 60.32 | 25.000                        | 26.629 | 0.7638         | 0.8615 |
|                         | 60                       | 0.0282                    | 0.0107 | 59.91                         | 53.02 | 11.405                        | 19.828 | 0.8876         | 0.8129 |
|                         | 40                       | 0.0198                    | 0.0121 | 39.96                         | 38.04 | 2.600                         | 10.343 | 0.6529         | 0.7586 |
|                         | 20                       | 0.0220                    | 0.0168 | 19.99                         | 19.44 | 1.321                         | 5.395  | 0.3645         | 0.4978 |
|                         | 70                       | 0.0214                    | 0.0156 | 69.65                         | 57.05 | 7.412                         | 12.868 | 0.6152         | 0.6446 |
| Pb <sup>2+</sup>        | 60                       | 0.0226                    | 0.0146 | 59.76                         | 51.18 | 5.339                         | 8.936  | 0.6051         | 0.5345 |
|                         | 50                       | 0.0196                    | 0.0140 | 49.90                         | 45.25 | 3.667                         | 6.070  | 0.4821         | 0.4398 |
|                         | 40                       | 0.0388                    | 0.0120 | 40                            | 39.04 | 1.492                         | 5.595  | 0.6953         | 0.3644 |
|                         | 30                       | 0.0372                    | 0.0520 | 30                            | 30    | 0.332                         | 6.937  | 0.2388         | 0.8044 |

**Table S2.** Pseudo second-order kinetic parameters for the adsorption of MB and Pb<sup>2+</sup> onto S1 and S2.

| MB<br>/Pb <sup>2+</sup> | C <sub>0</sub><br>(mg/L) | K <sub>2</sub><br>(g/(mg·min)) |         | q <sub>e, exp</sub><br>(mg/g) |         | q <sub>e, cal</sub><br>(mg/g) |         | R <sup>2</sup> |         |
|-------------------------|--------------------------|--------------------------------|---------|-------------------------------|---------|-------------------------------|---------|----------------|---------|
|                         |                          | S1                             | S2      | S1                            | S2      | S1                            | S2      | S1             | S2      |
|                         |                          |                                | 100     | 0.00138                       | 0.00180 | 99.60                         | 62.20   | 99.9001        | 62.7746 |
|                         | 80                       | 0.00238                        | 0.00234 | 79.78                         | 60.32   | 79.9361                       | 60.3865 | 0.99933        | 0.99853 |
| MB                      | 60                       | 0.01286                        | 0.00340 | 59.91                         | 53.02   | 60.0936                       | 52.0021 | 0.99997        | 0.99896 |
|                         | 40                       | 0.06577                        | 0.00803 | 39.96                         | 38.04   | 39.9840                       | 38.0373 | 1              | 0.99961 |
|                         | 20                       | 0.29750                        | 0.03486 | 19.99                         | 19.44   | 19.9920                       | 19.4401 | 1              | 0.99992 |
|                         | 70                       | 0.02647                        | 0.00844 | 69.65                         | 57.05   | 69.6379                       | 56.9800 | 0.99997        | 0.9996  |
|                         | 60                       | 0.03970                        | 0.01265 | 59.76                         | 51.18   | 59.7728                       | 51.0465 | 0.99998        | 0.9997  |
| Pb <sup>2+</sup>        | 50                       | 0.04579                        | 0.01919 | 49.90                         | 45.25   | 49.9002                       | 45.1264 | 0.99998        | 0.9998  |
|                         | 40                       | 0.26462                        | 0.01986 | 40.0                          | 39.04   | 40.0160                       | 38.8048 | 1              | 0.9996  |
|                         | 30                       | 5.55772                        | 0.06905 | 30.0                          | 30      | 30.0030                       | 30.0662 | 1              | 1       |

**Table S3.** Comparison of the adsorption capacities on various adsorbents.

| Adsorbents                      | Adsorption capacity ( $\text{mg.g}^{-1}$ ) |                  | Ref.      |
|---------------------------------|--------------------------------------------|------------------|-----------|
|                                 | MB                                         | Pb <sup>2+</sup> |           |
| S1                              | 247.3                                      | 248.9            | This work |
| S2                              | 117.8                                      | 315.0            | This work |
| WO <sub>3</sub> nanorods        | 73.0                                       | –                | 19        |
| WO <sub>3</sub> nanotube        | 75.0                                       | –                | 21        |
| Hollow WO <sub>3</sub> spheres  | 138.9                                      | –                | 26        |
| Magnetite/carbon nanotube       | 48.1                                       | –                | 35        |
| Diatomite                       | 156.6                                      | –                | 37        |
| W <sub>18</sub> O <sub>49</sub> | 201                                        | 192              | 38        |
| Attapulgitic clay@carbon        | –                                          | 263.8            | 39        |
| Hydroxyapatite                  | –                                          | 100              | 40        |
| Zinc silicate                   | –                                          | 210              | 41        |

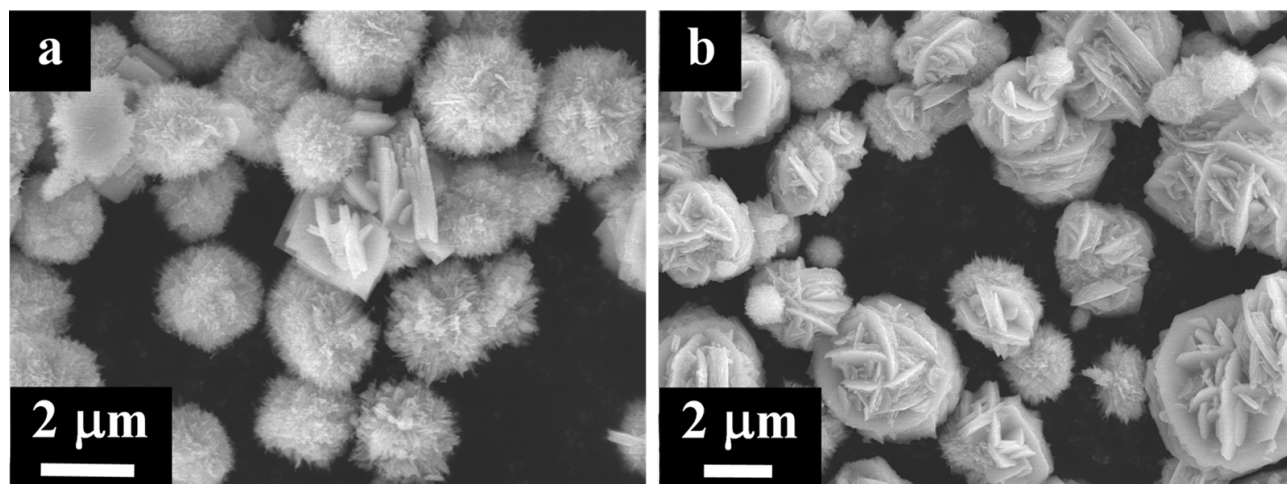

**Fig. S1.** Typical FESEM images of samples synthesized with different  $\text{Na}_2\text{WO}_4 \cdot 2\text{H}_2\text{O}$  concentration. (a) 0.02 M,  
(b) 0.03 M.

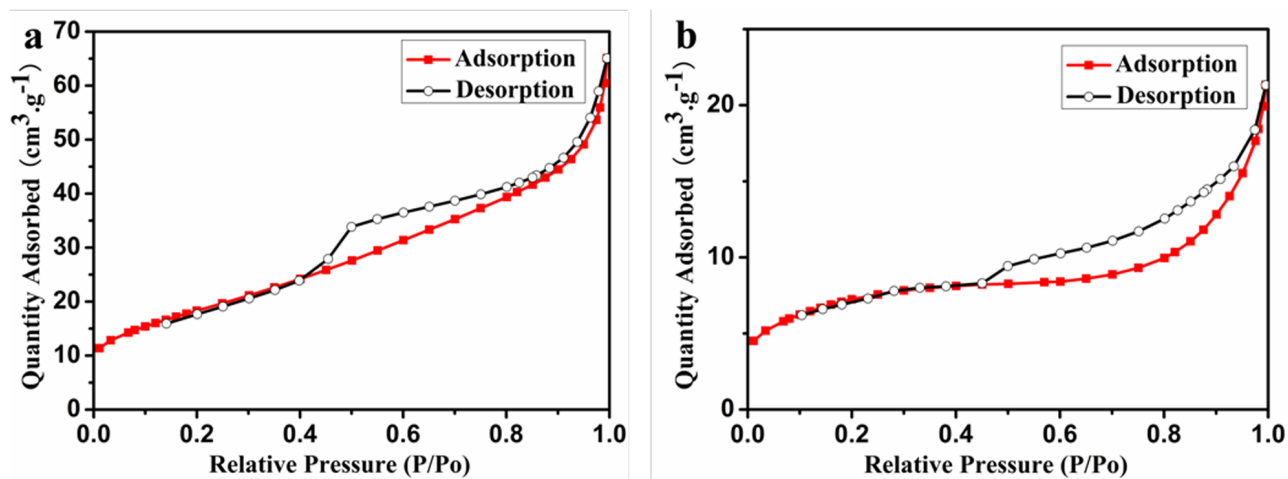

Fig. S2.  $N_2$  adsorption-desorption isotherms of S1 (a) and S2 (b).

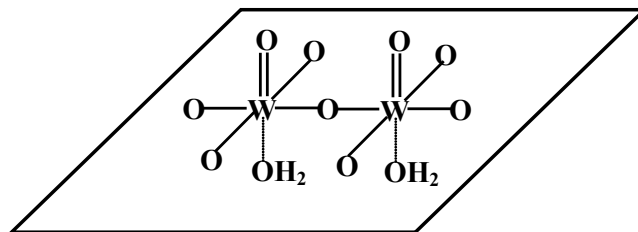

**Fig. S3.** Schematic illustration of the orthorhombic  $\text{WO}_3 \cdot \text{H}_2\text{O}$  structure.

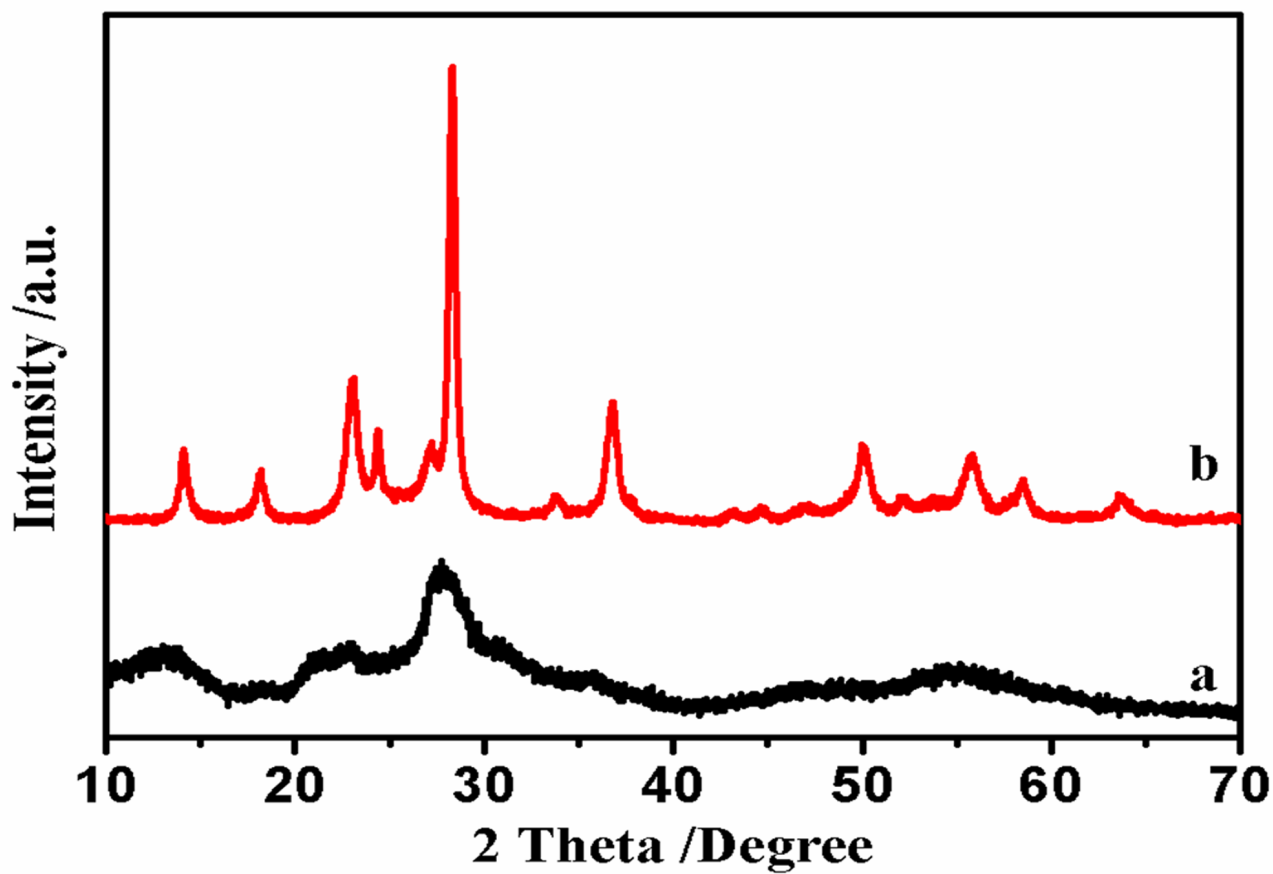

Fig. S4. XRD pattern of the samples collected at 60 min (a) and 90 min (b).



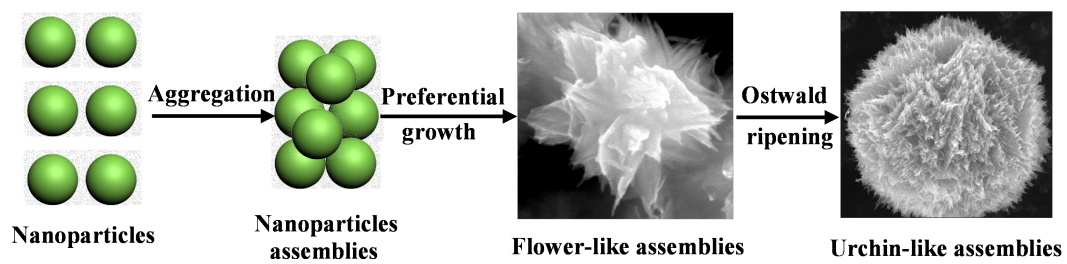

Fig. S5. Schematic illustration of the formation of S1.

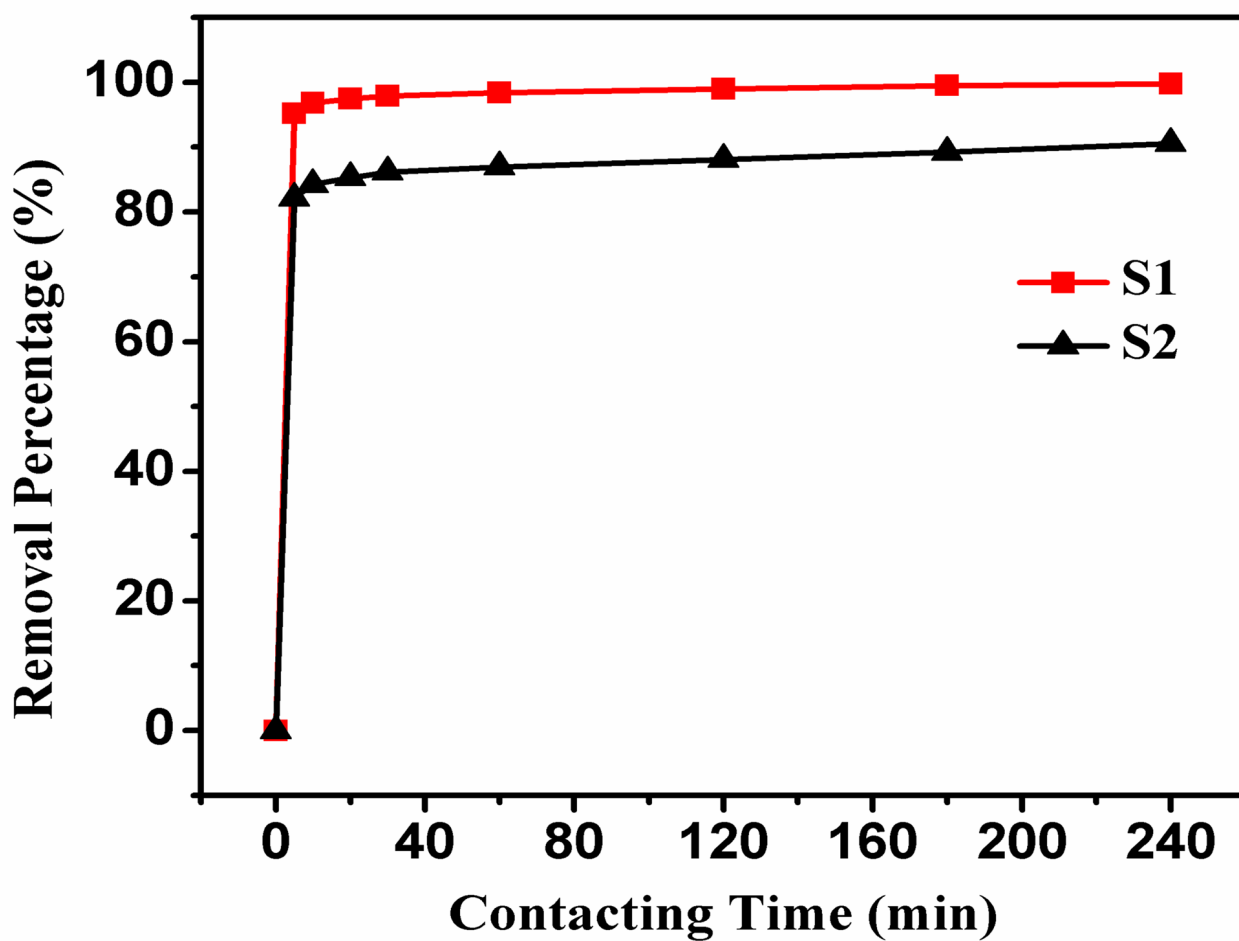

**Fig. S6.** Adsorption rate curves of Pb<sup>2+</sup> (initial concentration of 50 mg L<sup>-1</sup>, 20 mL) in the presence of S1/ S2 (20 mg).

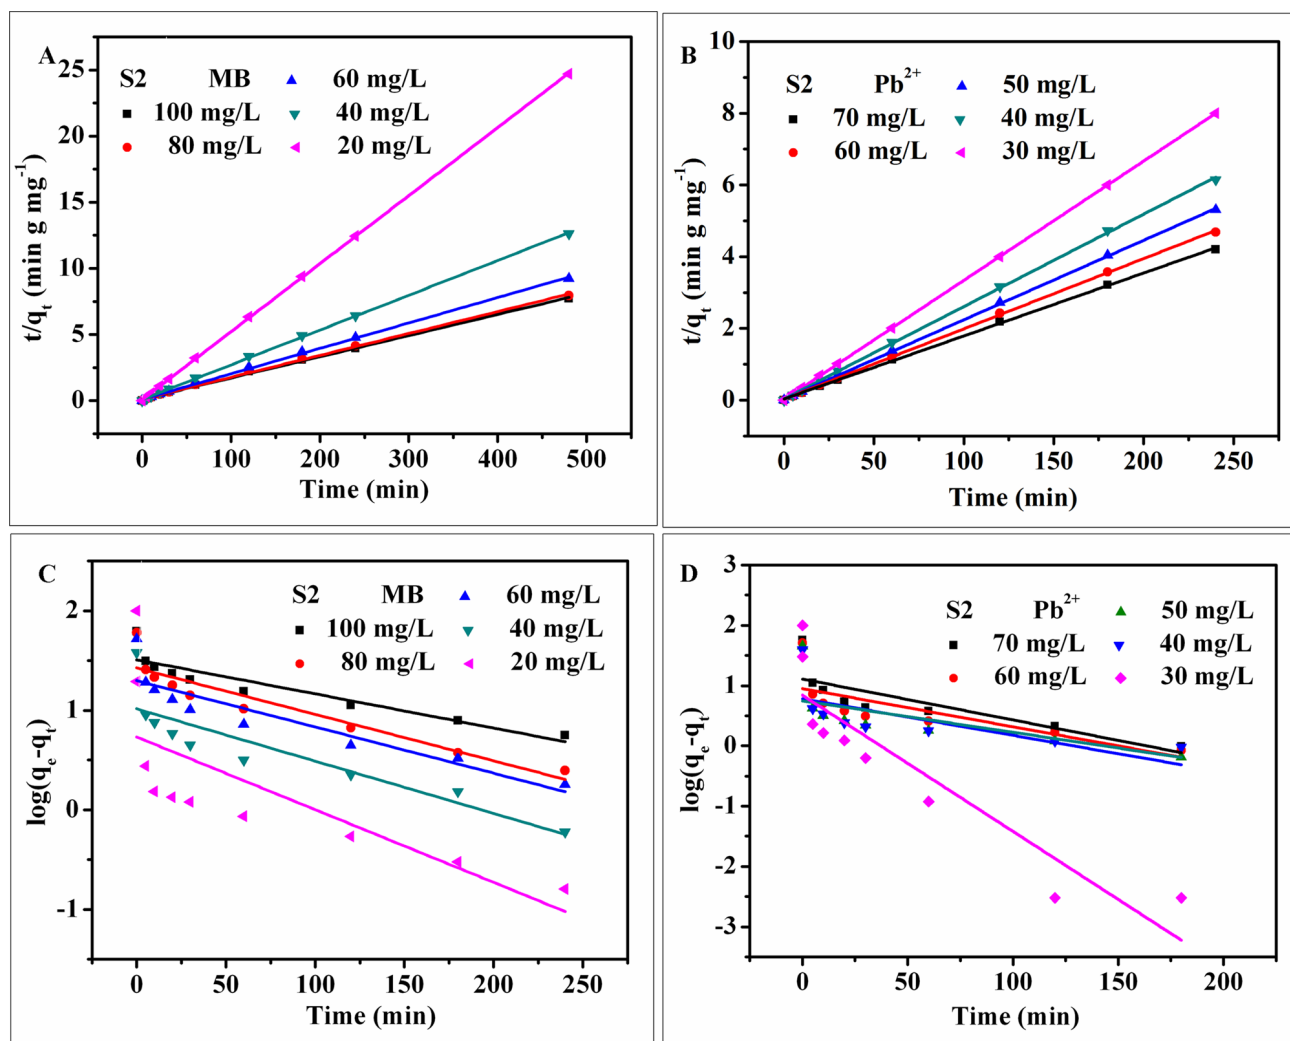

**Fig. S7.** Pseudo-second-order (A, B) and pseudo-first-order (C, D) kinetic model fitting of the plots for the adsorption of MB and Pb<sup>2+</sup> onto S2 at different concentrations.

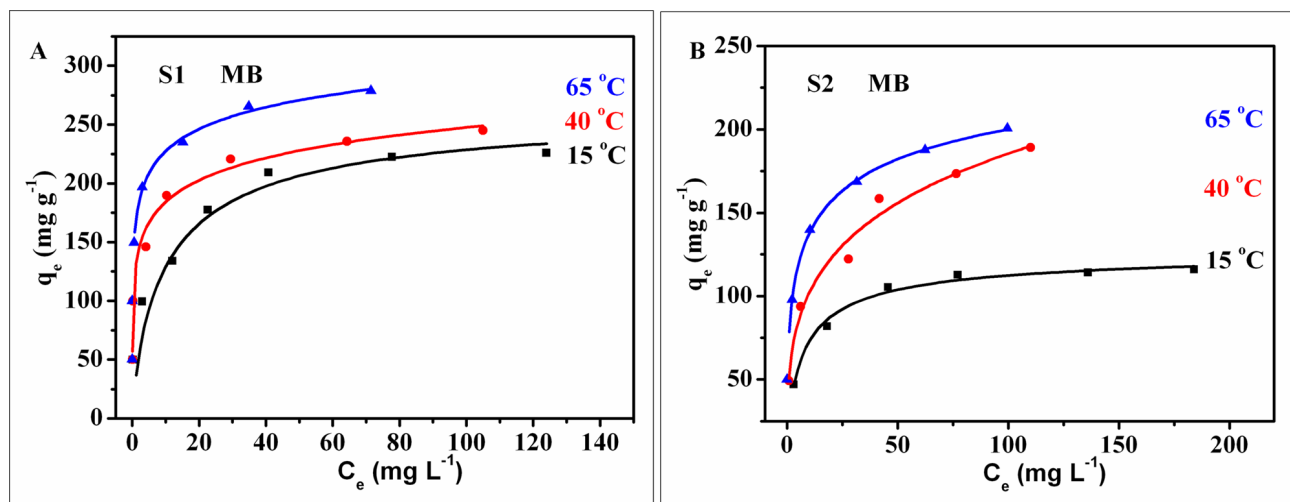

Fig. S8. Equilibrium isotherms of MB on S1 (A) and S2 (B) at different temperatures.

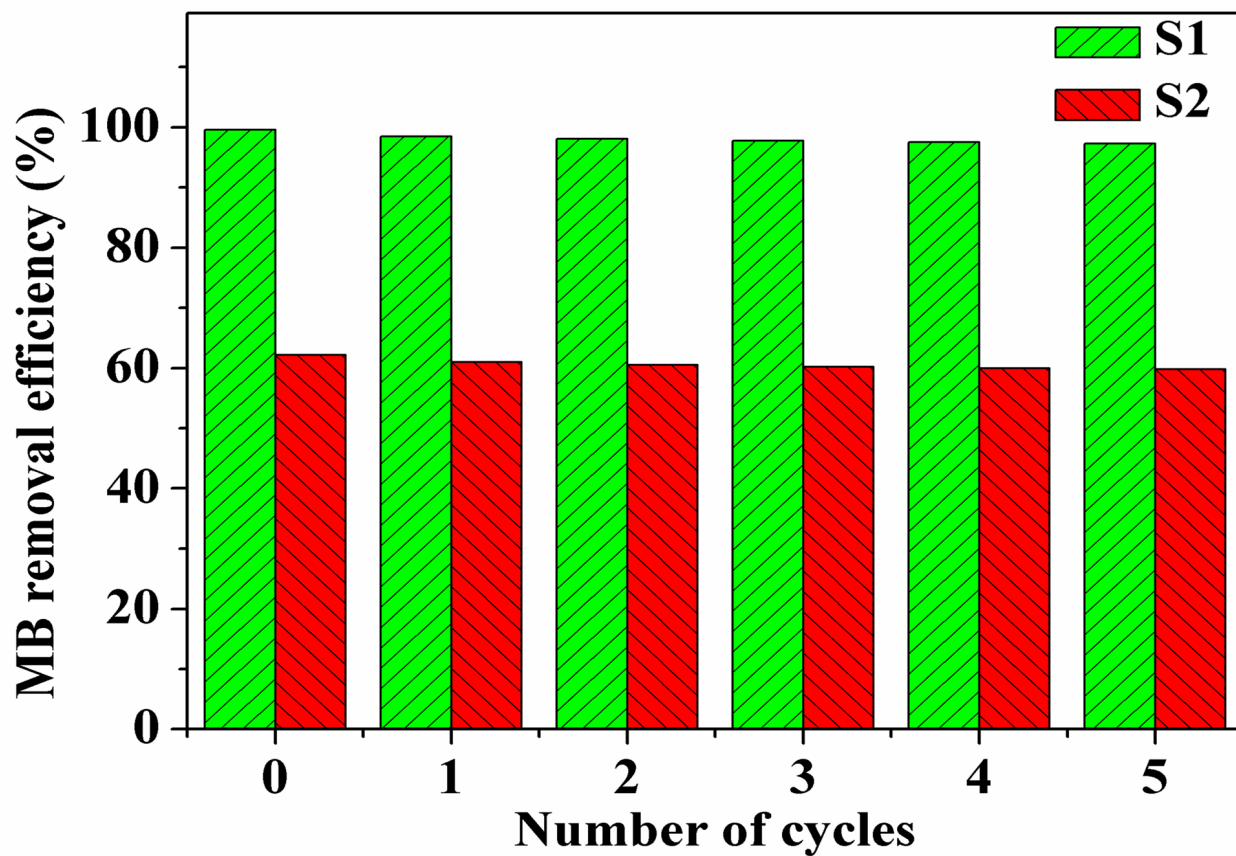

Fig. S9. Adsorption performance of S1 and S2 toward 100 mg/L MB solution within five cycles.

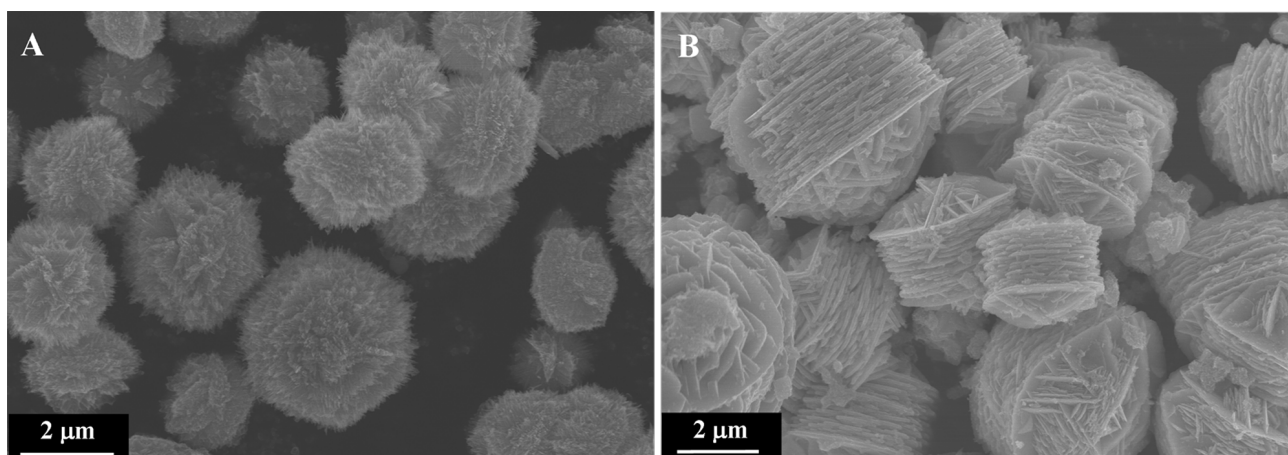

**Fig. S10.** Typical FESEM images of S1 (A) and S2 (B) after adsorption of MB for five cycles.

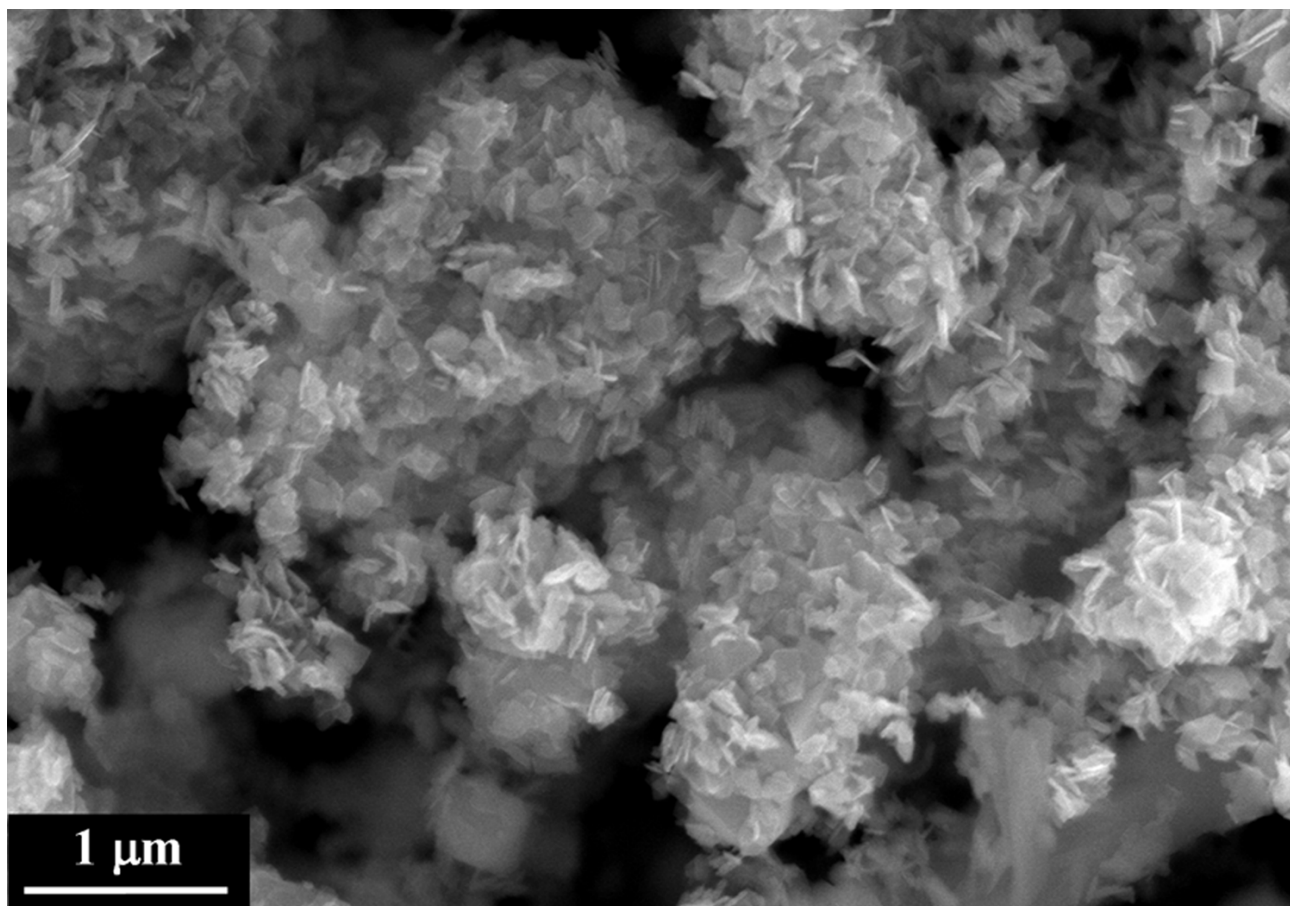

**Fig. S11.** Typical FESEM image of S1 after adsorption of  $\text{Pb}^{2+}$ .

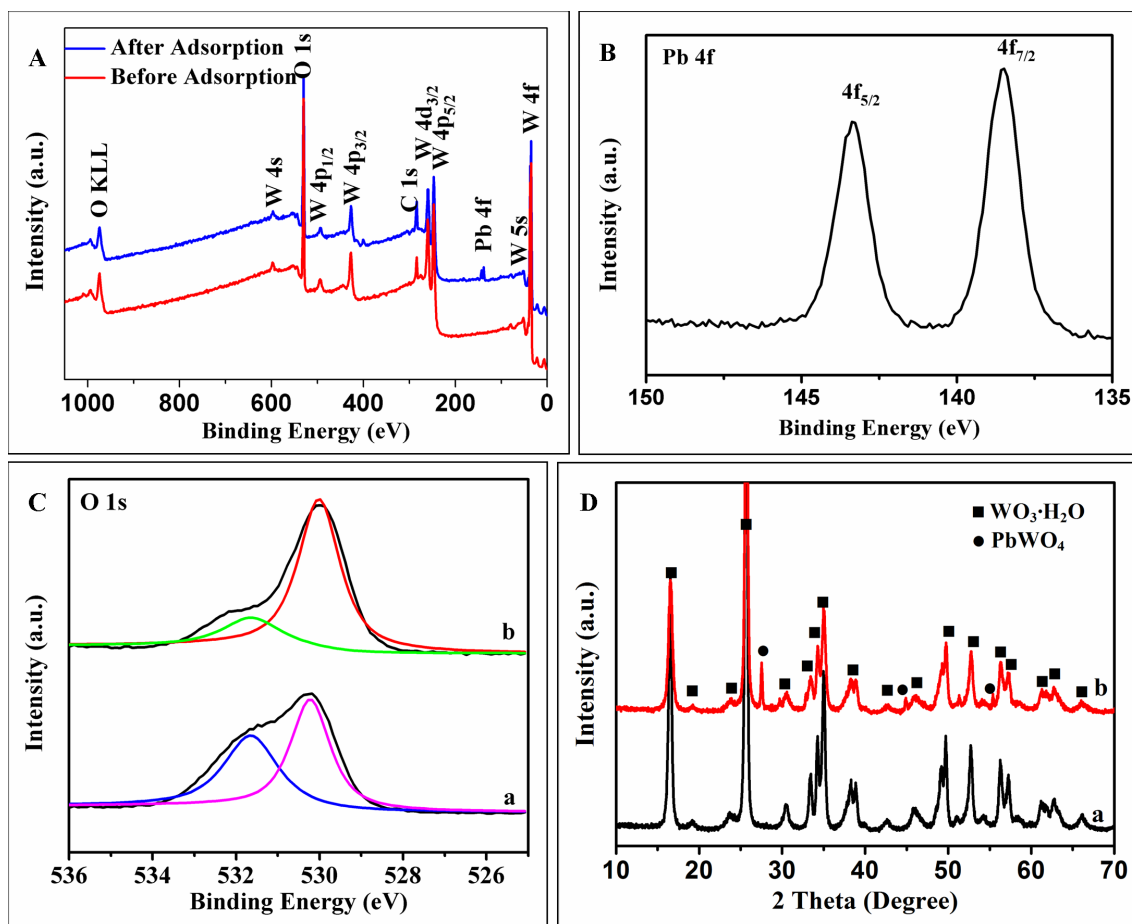

**Fig. S12.** (A) Full range XPS spectra of S2 before and after adsorption of Pb<sup>2+</sup>, (B) XPS spectra of Pb 4f, (C) XPS spectra of O 1s before (a) and after (b) adsorption of Pb<sup>2+</sup>, (D) XRD patterns of S2 before (a) and after (b) adsorption of Pb<sup>2+</sup>.

There is also no obvious change in the curves before and after adsorption except for Pb 4f peaks emerging obviously (Fig. S12A). Fig. S12B displays high resolution of Pb 4f peaks after adsorption. Doublet peaks appear at 143.2 eV and 138.3 eV, which are assigned to Pb 4f<sub>5/2</sub> and Pb 4f<sub>7/2</sub>, respectively. The peak at 138.3 eV is assigned to the bond of Pb-O, suggesting the formation of lead compound. Fig. S12C shows XPS spectra of O 1s before and after adsorption of Pb<sup>2+</sup>. A dominant peak at 530.0 eV and a shoulder peak at 531.7 eV are obvious after curve fitting, which is principally attributed to the crystal lattice oxygen (W=O, W-O-W) and surface-adsorbed OH (W-OH), respectively. After adsorption of Pb<sup>2+</sup>, the peak at 531.7 eV is obviously weakened,



indicating that some of W–OH groups are changed to other groups. The XRD patterns of S2 before (a) and after (b) adsorption of  $\text{Pb}^{2+}$  are shown in Fig. S12D. After adsorption, all the diffraction peaks can be indexed to  $\text{WO}_3 \cdot \text{H}_2\text{O}$  (JCPDS card No. 430679) and  $\text{PbWO}_4$  (JCPDS card No. 160516), suggesting  $\text{WO}_3 \cdot \text{H}_2\text{O}$  have been partially reacted with  $\text{Pb}^{2+}$ . The results verify the proposed uptake mechanism of  $\text{Pb}^{2+}$ , and it is also totally accordance with the results shown in Fig. 10.
